# Supplementary material
Source: PubMed Central journal article supplement (PMC5148201)
Supplement: ismej201680x3.pdf [file ismej201680x3.pdf]

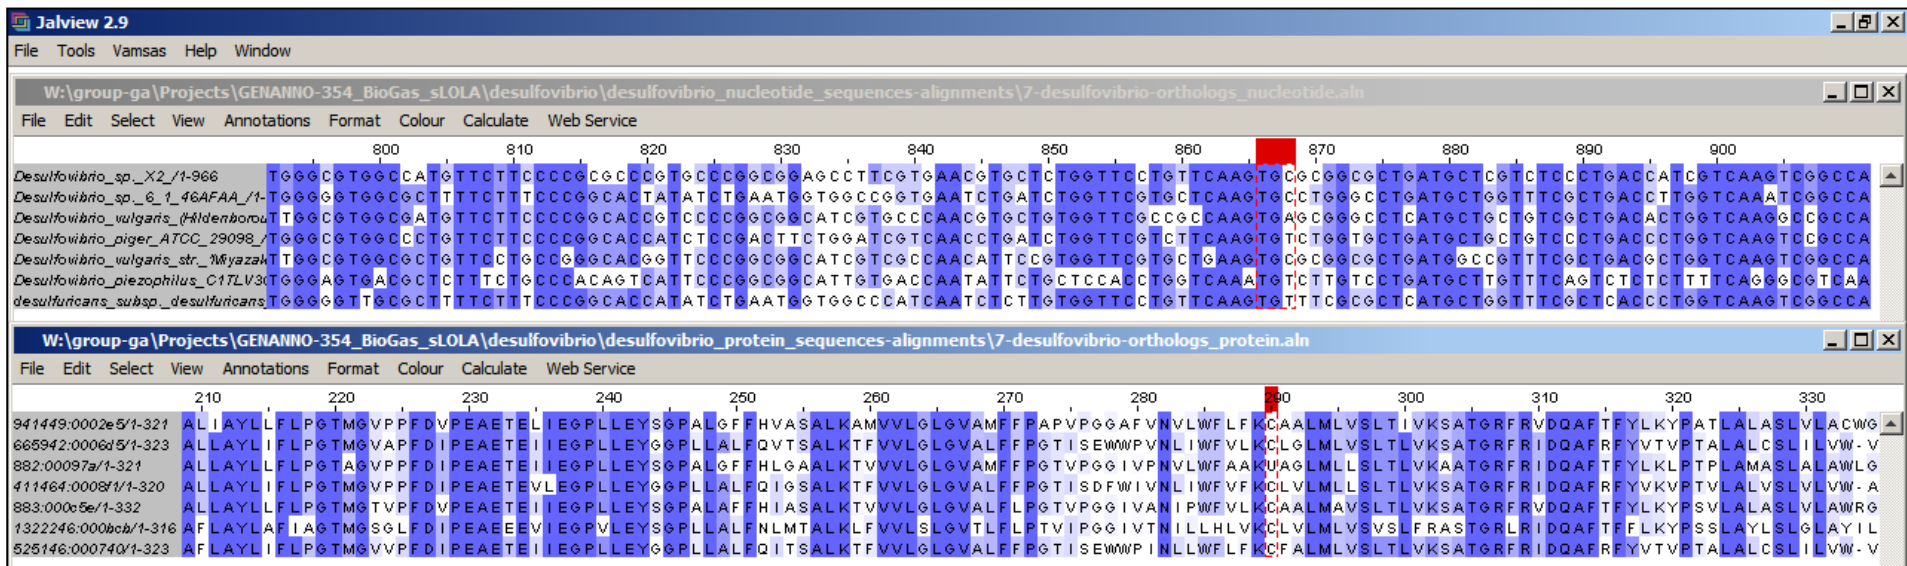

**Nucleotide and protein alignments for *Desulfovibrio* orthologs to DVU\_2287 [ *Desulfovibrio vulgaris* (Hildenborough) ]**

Aligned via JalView using Toffee [defaults], coloured by 'percentage identity'.

The 'U' residue/codon is in the red-highlighted box.

Orthologs aligned by organism [top-to-bottom]:

- Desulfovibrio* sp. X2
- Desulfovibrio* sp. 6\_1\_46FAA
- Desulfovibrio vulgaris* (Hildenborough)
- Desulfovibrio piger* ATCC 29098
- Desulfovibrio vulgaris* str. 'Miyazaki F'
- Desulfovibrio piezophilus* C1TLV30
- Desulfovibrio desulfuricans* subsp. *desulfuricans* str. ATCC 27774
